# Supplementary material
Source: publisher figshare collection journal article supplement (https://asha.figshare.com/articles/dataset/_/5561254)
Supplement: Supplementary file 1 [file 1]

Clinician \_\_\_\_\_ Participant \_\_\_\_\_

## WITH PROSODIC CUES

Date \_\_\_\_\_ Session # \_\_\_\_\_

ELICITATION for ro  
ELICITATION for ri— — —  
— — —Elicitation for  
Elicitation forθrΛ — — —  
brΛ — — —

Block: B or D (no ultrasound)

| Syllable | Feed-back | Score | Self-Rate | Monosyl Wd | Pros Cue | Feed-back | Score | Self-Rate | Multisyl. Wd | Pros Cue | Feed-back | Score | Self-Rate | Phrase                | Pros Cue | Feed-back | Score | Self-Rate | Gener-ated | Pros Cue | Feed-back | Score | Self-Rate |  |  |  |
|----------|-----------|-------|-----------|------------|----------|-----------|-------|-----------|--------------|----------|-----------|-------|-----------|-----------------------|----------|-----------|-------|-----------|------------|----------|-----------|-------|-----------|--|--|--|
| ro       | KR,KP     |       |           | rope       | ?        | KR,KP     |       |           | tightrope    | slow     |           |       |           | walk a tightrope      | loud     |           |       |           | x          | ?        |           |       |           |  |  |  |
|          | KR,KP     |       |           |            | ?        | KR        |       |           |              | slow     | KR,KP     |       |           |                       |          | ?         | KR,KP |           |            |          |           | .     | KR,KP     |  |  |  |
|          |           |       |           |            | ?        | KR,KP     |       |           |              | loud     | KR,KP     |       |           |                       |          | .         | KR,KP |           |            |          |           | !     | KR        |  |  |  |
|          | KR,KP     |       |           |            | .        | KR,KP     |       |           |              | loud     | KR        |       |           |                       |          | slow      |       |           |            |          |           | loud  |           |  |  |  |
|          | KR,KP     |       |           |            | .        |           |       |           |              | !        |           |       |           |                       |          | !         | KR    |           |            |          |           | slow  | KR        |  |  |  |
|          | KR        |       |           |            | .        | KR        |       |           |              | !        | KR        |       |           |                       |          | fast      |       |           |            |          |           | fast  |           |  |  |  |
|          |           | /6    |           |            |          |           | /6    |           |              |          |           | /6    |           |                       |          |           | /6    |           |            |          |           | /6    |           |  |  |  |
| ri       | KR,KP     |       |           | reek       | .        | KR,KP     |       |           | recline      | .        | KR,KP     |       |           | recline on the couch  | slow     | KR        |       |           | x          | slow     | KR        |       |           |  |  |  |
|          | KR,KP     |       |           |            | .        | KR        |       |           |              | ?        | KR,KP     |       |           |                       | ?        |           |       |           |            |          | loud      |       |           |  |  |  |
|          | KR,KP     |       |           |            | .        | KR,KP     |       |           |              | ?        | KR,KP     |       |           |                       | .        | KR,KP     |       |           |            |          | fast      | KR    |           |  |  |  |
|          |           |       |           |            | Slow     |           |       |           |              | ?        | KR        |       |           |                       | !        |           |       |           |            |          | !         |       |           |  |  |  |
|          | KR,KP     |       |           |            | Slow     | KR        |       |           |              | !        |           |       |           |                       | fast     | KR,KP     |       |           |            |          | .         | KR,KP |           |  |  |  |
|          | KR        |       |           |            | Slow     | KR,KP     |       |           |              | !        | KR        |       |           |                       | loud     |           |       |           |            |          | ?         |       |           |  |  |  |
|          |           | /6    |           |            |          |           | /6    |           |              |          |           | /6    |           |                       |          |           | /6    |           |            |          |           | /6    |           |  |  |  |
| θrΛ      | KR,KP     |       |           | thrif      | slow     | KR,KP     |       |           | thrifty      | slow     | KR,KP     |       |           | thrif shop            | loud     | KR,KP     |       |           | x          | fast     | KR,KP     |       |           |  |  |  |
|          |           |       |           |            | slow     |           |       |           |              | slow     |           |       |           |                       | slow     | KR        |       |           |            |          | loud      | KR    |           |  |  |  |
|          | KR,KP     |       |           |            | slow     | KR        |       |           |              | !        | KR,KP     |       |           |                       | !        | KR,KP     |       |           |            |          | ?         | KR    |           |  |  |  |
|          | KR,KP     |       |           |            | ?        | KR,KP     |       |           |              | !        | KR        |       |           |                       | ?        |           |       |           |            |          | slow      |       |           |  |  |  |
|          | KR,KP     |       |           |            | ?        | KR,KP     |       |           |              | ?        |           |       |           |                       | ?        |           |       |           |            |          | !         |       |           |  |  |  |
|          | KR        |       |           |            | ?        | KR        |       |           |              | ?        | KR        |       |           |                       | ?        | KR        |       |           |            |          | .         |       |           |  |  |  |
|          |           | /6    |           |            |          |           | /6    |           |              |          |           | /6    |           |                       |          |           | /6    |           |            |          |           | /6    |           |  |  |  |
| brΛ      | KR,KP     |       |           | broom      | .        | KR,KP     |       |           | broomstick   | .        | KR,KP     |       |           | witch on a broomstick | .        | KR        |       |           | x          | loud     | KR        |       |           |  |  |  |
|          | KR,KP     |       |           |            | .        | KR,KP     |       |           |              | loud     |           |       |           |                       | ?        |           |       |           |            | ?        |           |       |           |  |  |  |
|          | KR,KP     |       |           |            | .        | KR,KP     |       |           |              | loud     | KR        |       |           |                       | !        | KR,KP     |       |           |            |          | fast      | KR    |           |  |  |  |
|          | KR,KP     |       |           |            | slow     | KR        |       |           |              | !        | KR,KP     |       |           |                       | !        |           |       |           |            |          | !         |       |           |  |  |  |
|          | KR,KP     |       |           |            | slow     | KR,KP     |       |           |              | !        | KR,KP     |       |           |                       | fast     | KR,KP     |       |           |            |          | .         | KR,KP |           |  |  |  |
|          | KR        |       |           |            | slow     | KR        |       |           |              | !        | KR        |       |           |                       | loud     |           |       |           |            |          | slow      |       |           |  |  |  |
|          |           | /6    |           |            |          |           | /6    |           |              |          |           | /6    |           |                       |          |           | /6    |           |            |          |           | /6    |           |  |  |  |
| ro       | KR,KP     |       |           | roll       | ?        | KR,KP     |       |           | rolling      | slow     |           |       |           | rolling downhill      | !        |           |       |           | x          | slow     |           |       |           |  |  |  |
|          | KR,KP     |       |           |            | ?        | KR        |       |           |              | slow     | KR,KP     |       |           |                       | ?        | KR,KP     |       |           |            |          | ?         | KR    |           |  |  |  |
|          | KR,KP     |       |           |            | ?        | KR,KP     |       |           |              | .        |           |       |           |                       | fast     | KR,KP     |       |           |            |          | !         | KR,KP |           |  |  |  |
|          | KR,KP     |       |           |            | slow     | KR,KP     |       |           |              | .        | KR        |       |           |                       | slow     |           |       |           |            |          | loud      |       |           |  |  |  |
|          |           |       |           |            | slow     |           |       |           |              | ?        | KR,KP     |       |           |                       | loud     |           |       |           |            |          | fast      |       |           |  |  |  |
|          | KR        |       |           |            | slow     | KR        |       |           |              | ?        | KR        |       |           |                       | ?        | KR        |       |           |            |          | .         | KR    |           |  |  |  |
|          |           | /6    |           |            |          |           | /6    |           |              |          |           | /6    |           |                       |          |           | /6    |           |            |          |           | /6    |           |  |  |  |
| ri       | KR,KP     |       |           | real       | .        | KR,KP     |       |           | realize      | !        | KR,KP     |       |           | didn't realize        | ?        | KR,KP     |       |           | x          | fast     | KR,KP     |       |           |  |  |  |
|          | KR,KP     |       |           |            | .        |           |       |           |              | !        | KR,KP     |       |           |                       | .        |           |       |           |            |          | .         |       |           |  |  |  |
|          |           |       |           |            | .        | KR        |       |           |              | slow     | KR        |       |           |                       | fast     | KR        |       |           |            |          | ?         | KR    |           |  |  |  |
|          | KR,KP     |       |           |            | ?        | KR,KP     |       |           |              | slow     | KR        |       |           |                       | slow     |           |       |           |            |          | loud      |       |           |  |  |  |
|          | KR,KP     |       |           |            | ?        | KR        |       |           |              | .        |           |       |           |                       | loud     |           |       |           |            |          | slow      |       |           |  |  |  |
|          | KR        |       |           |            | ?        | KR,KP     |       |           |              | .        |           |       |           |                       | !        | KR,KP     |       |           |            |          | !         | KR    |           |  |  |  |
|          |           | /6    |           |            |          |           | /6    |           |              |          |           | /6    |           |                       |          |           | /6    |           |            |          |           | /6    |           |  |  |  |
| θrΛ      | KR,KP     |       |           | throb      | slow     | KR,KP     |       |           | throbbing    | ?        | KR,KP     |       |           | throbbing headache    | !        | KR,KP     |       |           | x          | !        | KR,KP     |       |           |  |  |  |
|          | KR,KP     |       |           |            | slow     |           |       |           |              | ?        | KR,KP     |       |           |                       | ?        |           |       |           |            |          | fast      |       |           |  |  |  |
|          |           |       |           |            | slow     | KR        |       |           |              | loud     | KR        |       |           |                       | slow     | KR        |       |           |            |          | slow      | KR    |           |  |  |  |
|          | KR,KP     |       |           |            | .        | KR,KP     |       |           |              | loud     | KR        |       |           |                       | .        |           |       |           |            |          | .         |       |           |  |  |  |
|          | KR,KP     |       |           |            | .        | KR        |       |           |              | .        |           |       |           |                       | loud     |           |       |           |            |          | loud      |       |           |  |  |  |
|          | KR        |       |           |            | .        | KR,KP     |       |           |              | .        |           |       |           |                       | fast     | KR,KP     |       |           |            |          | ?         | KR    |           |  |  |  |
|          |           | /6    |           |            |          |           | /6    |           |              |          |           | /6    |           |                       |          |           | /6    |           |            |          |           | /6    |           |  |  |  |
| brΛ      | KR,KP     |       |           | breathe    | ?        | KR,KP     |       |           | breathing    | slow     | KR,KP     |       |           | breathing heavily     | fast     | KR,KP     |       |           | x          | !        | KR,KP     |       |           |  |  |  |
|          | KR,KP     |       |           |            | ?        |           |       |           |              | slow     | KR,KP     |       |           |                       | loud     |           |       |           |            |          | fast      |       |           |  |  |  |
|          |           |       |           |            | ?        | KR        |       |           |              | ?        | KR        |       |           |                       | ?        | KR        |       |           |            |          | ?         | KR    |           |  |  |  |
|          | KR,KP     |       |           |            | slow     | KR,KP     |       |           |              | ?        | KR        |       |           |                       | !        |           |       |           |            |          | loud      |       |           |  |  |  |
|          | KR,KP     |       |           |            | slow     | KR        |       |           |              | !        |           |       |           |                       | slow     |           |       |           |            |          | slow      |       |           |  |  |  |
|          | KR        |       |           |            | slow     | KR,KP     |       |           |              | !        |           |       |           |                       | .        | KR,KP     |       |           |            |          | KR        |       |           |  |  |  |
|          |           | /6    |           |            |          |           | /6    |           |              |          |           | /6    |           |                       |          |           | /6    |           |            |          |           | /6    |           |  |  |  |
