# Supplementary material
Source: publisher figshare collection journal article supplement (https://asha.figshare.com/articles/dataset/_/5561254)
Supplement: Supplementary file 2 [file 1]

**Supplemental Material S6.** Generalization probe lists, which were used to track progress.

**ONSET SINGLETON /ɹ/**

- 1 Rectangle
- 2 Rabbit
- 3 Rock
- 4 Rattle
- 5 Rooster
- 6 Rice
- 7 Rocket
- 8 Wrench
- 9 Raisins
- 10 Rhino
- 11 Rat
- 12 Ring
- 13 Roses
- 14 Wreath
- 15 Rain
- 16 Rope
- 17 Rusty
- 18 Run
- 19 Reading
- 20 Relish
- 21 Radio
- 22 Roots
- 23 Richest
- 24 Robin
- 25 Robot

**RHYME/POSTVOCALIC /ɹ/**

- 1 Umpire
- 2 Candy bar
- 3 Cheer
- 4 Doormat
- 5 Bookstore
- 6 Star
- 7 Beard
- 8 Chandelier
- 9 Scare
- 10 Fire
- 11 Acorn
- 12 Twenty four
- 13 Guitar
- 14 Dinosaur
- 15 Vampire
- 16 Careful
- 17 Hairy
- 18 Shorts
- 19 Tornado
- 20 Tire
- 21 Alarm
- 22 Square
- 23 Popcorn
- 24 Steer
- 25 Panda Bear

**Supplemental Material S6.** Generalization probe lists, which were used to track progress.

**ONSET CLUSTER /ɹ/**

|    |          |    |             |
|----|----------|----|-------------|
| 1  | Pretzel  | 26 | Grass       |
| 2  | Present  | 27 | Grill       |
| 3  | Prince   | 28 | Gravy       |
| 4  | Prize    | 29 | Graduate    |
| 5  | Bread    | 30 | Fruit       |
| 6  | Bracelet | 31 | Freckles    |
| 7  | Broom    | 32 | Frog        |
| 8  | Bridge   | 33 | Frying pan  |
| 9  | Train    | 34 | Shrimp      |
| 10 | Triangle | 35 | Shrek       |
| 11 | Truck    | 36 | Shredder    |
| 12 | Treasure | 37 | Three       |
| 13 | Tractor  | 38 | Thread      |
| 14 | Driving  | 39 | Throne      |
| 15 | Drinking | 40 | Throwing    |
| 16 | Dragon   | 41 | Screwdriver |
| 17 | Drum     | 42 | Scroll      |
| 18 | Dress    | 43 | Scratch     |
| 19 | Crutches | 44 | Spray       |
| 20 | Crayon   | 45 | Sprinkler   |
| 21 | Crab     | 46 | Sprinkles   |
| 22 | Cry      | 47 | Straw       |
| 23 | Crown    | 48 | Strawberry  |
| 24 | Green    | 49 | Strong      |
| 25 | Grapes   | 50 | Stream      |

**Supplemental Material S6.** Generalization probe lists, which were used to track progress.

#### **NUCLEUS RHYME /ɹ/**

- 1 Bird
- 2 heard
- 3 girl
- 4 stern
- 5 thirsty
- 6 curtain
- 7 fern
- 8 birth
- 9 birthday
- 10 pearl
- 11 earn
- 12 certain
- 13 shirt
- 14 turtle
- 15 first
- 16 burn
- 17 learn
- 18 dirt
- 19 adjourn
- 20 girth
- 21 hurt
- 22 flirt
- 23 jerky
- 24 work
- 25 turn

#### **SENTENCE REPETITION GENERALIZATION TASK**

1. George stayed true to his roots.
2. The early bird gets the worm.
3. The eager squirrel travels far to get nuts.
4. Smart children try not to break their arm.
5. The silly dog barks and wants to chase the ice cream man.
6. Suzie wore a simple red dress to brunch.
7. The cops arrest a robber at the drug store.
8. Brave Greg starts running from minor threats.
9. The short mouse was close to stealing a piece of bread.
10. Let's go somewhere so I can sort my thoughts.
11. Sometimes I read nonsense words to sound silly.
12. I tore my shirt near the railing in my house.
13. The fair is in a place that rains steadily in the summer.
14. We play chess at school during class parties.
15. My oar slipped and sank when I was rowing in the river.
